# Supplementary material for: Synthesis, structure and electrochemical performance of an ultra-high-entropy rare earth orthoferrite (UHE REO) for overall water splitting (OWS)
Source: Royal Society of Chemistry journal article supplement (doi:10.1039/d3se01535a), 2024-01-01
Supplement: d3se01535a1.pdf [file d3se01535a1.pdf]

### Electronic Supplementary Information

Article “Synthesis, Structure and Electrochemical Performance of Ultra-High-Entropy Rare Earth Orthoferrite (UHE REO) for Overall Water Splitting (OWS)”

In this work, X-ray electron spectroscopy (XPS) was performed using an ESCALAB 250Xi spectrometer (Thermo Fisher Scientific, USA) with Al K $\alpha$  radiation. The obtained spectra were fitted using the Voigt fitting method via the Fityk software. The resulting data are shown in **Table S1** and **Fig. S1**.

**Table S1.** Values of binding energy, spin-orbit splitting energy, and corresponding oxidation state of UHE REO's constituent elements

| No | Elements | Orbitals          | Binding energy peaks, eV | Spin-orbit splitting energy, eV | Oxidation state |
|----|----------|-------------------|--------------------------|---------------------------------|-----------------|
| 1  | Sc       | 2p <sub>3/2</sub> | 401                      | 5                               | +3              |
|    |          | 2p <sub>1/2</sub> | 406                      |                                 |                 |
| 2  | Y        | 3d <sub>5/2</sub> | 157                      | 2                               | +3              |
|    |          | 3d <sub>3/2</sub> | 159                      |                                 |                 |
| 3  | La       | 3d <sub>5/2</sub> | 834                      | 17                              | +3              |
|    |          | 3d <sub>3/2</sub> | 851                      |                                 |                 |
| 4  | Ce       | 3d <sub>5/2</sub> | 885                      | 16                              | +4              |
|    |          | 3d <sub>3/2</sub> | 901                      |                                 |                 |
| 5  | Pr       | 3d <sub>5/2</sub> | 932                      | 18                              | +3              |
|    |          | 3d <sub>3/2</sub> | 950                      |                                 |                 |
| 6  | Nd       | 3d <sub>5/2</sub> | 974                      | 21                              | +3              |
|    |          | 3d <sub>3/2</sub> | 995                      |                                 |                 |
| 7  | Sm       | 3d <sub>5/2</sub> | 1082                     | 23                              | +3              |
|    |          | 3d <sub>3/2</sub> | 1105                     |                                 |                 |
| 8  | Eu       | 3d <sub>5/2</sub> | 1132                     | 32                              | +3              |
|    |          | 3d <sub>3/2</sub> | 1164                     |                                 |                 |
| 9  | Gd       | 3d <sub>5/2</sub> | 1186                     | 35                              | +3              |
|    |          | 3d <sub>3/2</sub> | 1221                     |                                 |                 |
| 10 | Tb       | 3d <sub>5/2</sub> | 1246                     | 28                              | +3              |
|    |          | 3d <sub>3/2</sub> | 1274                     |                                 |                 |
| 11 | Dy       | 3d <sub>5/2</sub> | 1300                     | 30                              | +3              |
|    |          | 3d <sub>3/2</sub> | 1330                     |                                 |                 |
| 12 | Ho       | 4d                | 161                      | –                               | +3              |
| 13 | Er       | 4d                | 168                      | –                               | +3              |
| 14 | Tm       | 4d                | 176                      | –                               | +3              |
| 15 | Yb       | 4d                | 185                      | –                               | +3              |
| 16 | Lu       | 4d <sub>5/2</sub> | 196                      | 10                              | +3              |
|    |          | 4d <sub>3/2</sub> | 206                      |                                 |                 |

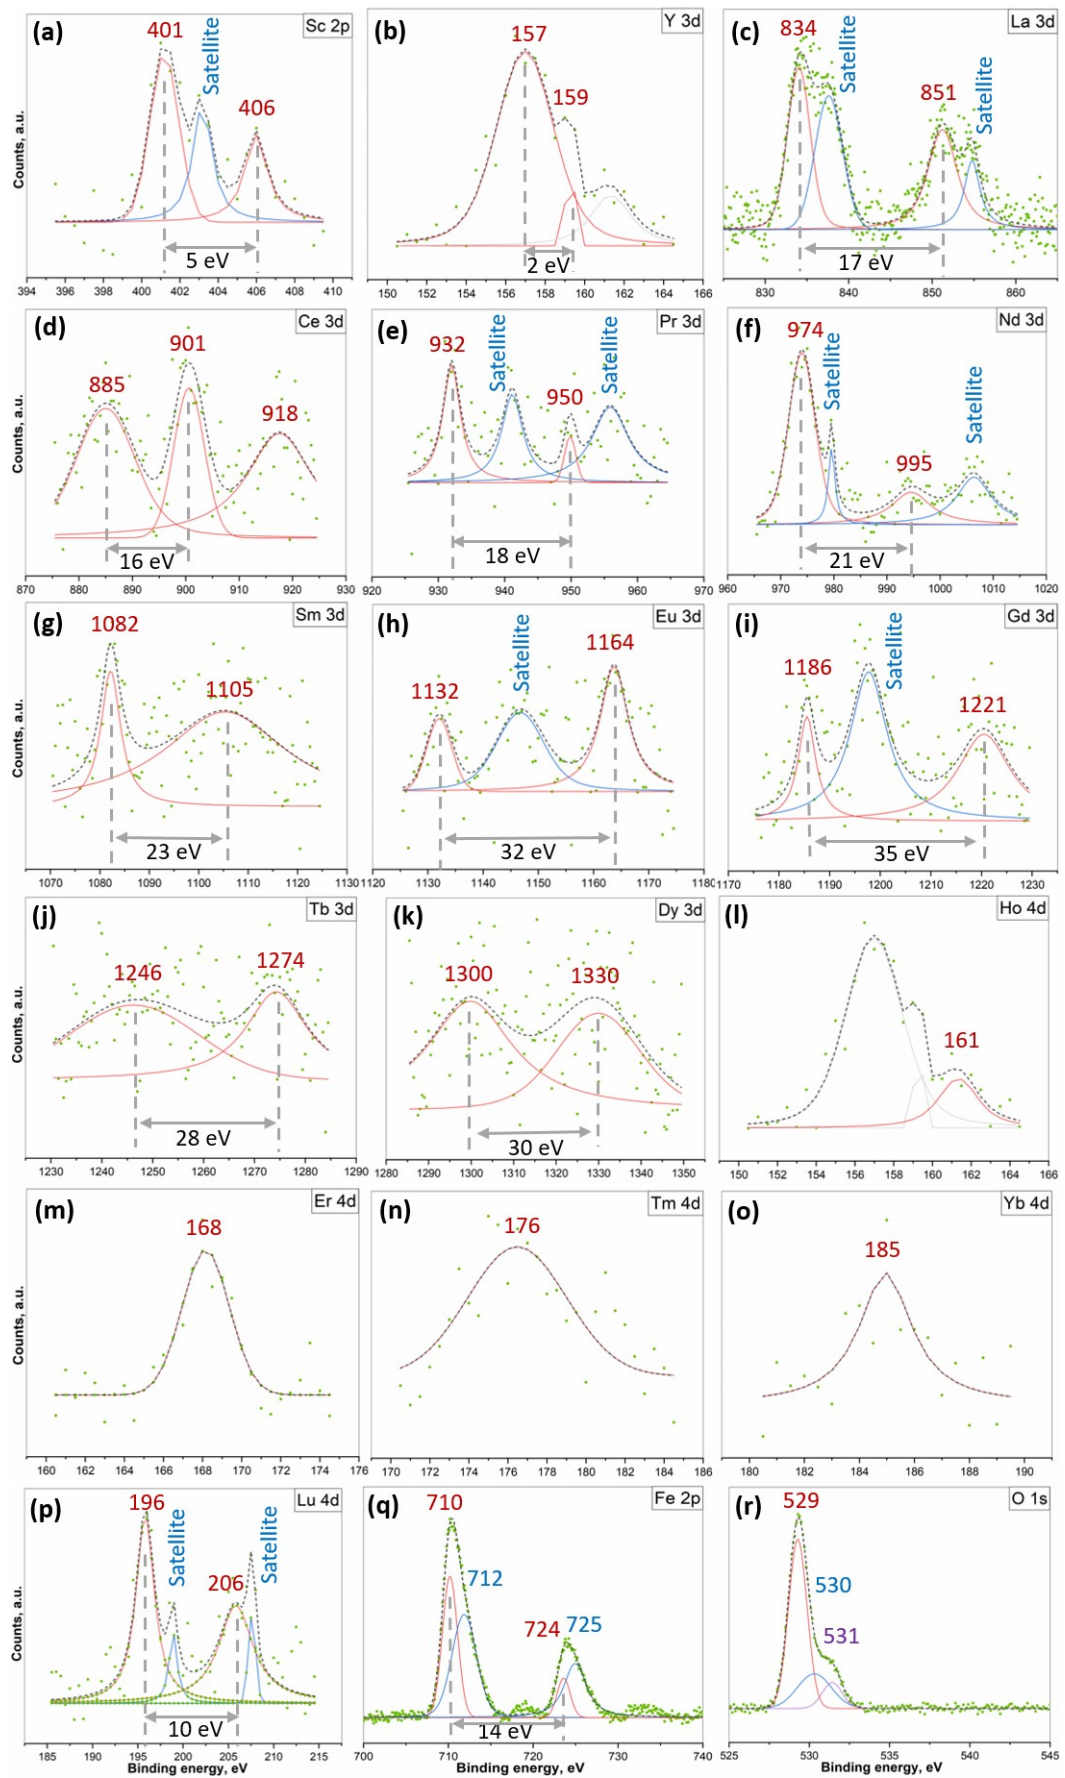

**Fig. S1.** XPS profiles of UHE REO's constituent elements: Sc 2p (a), Y 3d (b), La 3d (c), Ce 3d (d), Pr 3d (e), Nd 3d (f), Sm 3d (g), Eu 3d (h), Gd 3d (i), Tb 3d (j), Dy 3d (k), Ho 4d (l), Er 4d (m), Tm 4d (n), Yb 4d (o), Lu 4d (p), Fe 2p (q), and O 1s (r).

The characteristic values of binding energy (BE) peaks and spin-orbit (S-O) splitting energy of the compound's individual rare earth element are listed in **Table S1**. As can be seen, almost all rare earth metals in the UHE REO have a trivalent oxidation state [1–4]. However, there are some exceptions, such as the fact that the Ce element exists primarily in the +4-oxidation number [5]. Furthermore, for the Fe 2p XPS profile (see **Fig. S1-q**), the BE peaks centered at 710, 724 eV and 712, 725 eV belong to the oxidation states of Fe(II) and Fe(III), respectively [6]. For the O 1s XPS profile (**Fig. S1-r**), the BE peaks observed at 529, 530, and 531 eV can be attributed to lattice oxygen, defective oxygen, and surface-adsorbed oxygen, respectively [7,8].

## Reference

- [1] M.H. Joo, S.J. Park, S.-M. Hong, C.K. Rhee, D. Kim, Y. Sohn, Electrodeposition and Characterization of Lanthanide Elements on Carbon Sheets, *Coatings*. 11 (2021) 100. <https://doi.org/10.3390/coatings11010100>.
- [2] R. Rahman, J.P. Klesko, A. Dangerfield, M. Fang, J.-S.M. Lehn, C.L. Dezelah, R.K. Kanjolia, Y.J. Chabal, Mechanistic study of the atomic layer deposition of scandium oxide films using  $\text{Sc}(\text{MeCp})_2(\text{Me}_2\text{pz})$  and ozone, *J. Vac. Sci. Technol. A Vacuum, Surfaces, Film*. 37 (2019). <https://doi.org/10.1116/1.5059695>.
- [3] L. Mariscal-Becerra, R. Vázquez-Arreguín, U. Balderas, S. Carmona-Téllez, H. Murrieta Sánchez, C. Falcony, Luminescent characteristics of layered yttrium oxide nano-phosphors doped with europium, *J. Appl. Phys.* 121 (2017). <https://doi.org/10.1063/1.4979209>.
- [4] P. Misra, S.P. Pavunny, Y. Sharma, R.S. Katiyar, Resistive Switching and Current Conduction Mechanisms in Amorphous  $\text{LaLuO}_3$  Thin Films Grown by Pulsed Laser Deposition, *Integr. Ferroelectr.* 157 (2014) 47–56. <https://doi.org/10.1080/10584587.2014.911633>.
- [5] A. Sarkar, C. Loho, L. Velasco, T. Thomas, S.S. Bhattacharya, H. Hahn, R. Djenadic, Multicomponent equiatomic rare earth oxides with a narrow band gap and associated praseodymium multivalency, *Dalt. Trans.* 46 (2017) 12167–12176. <https://doi.org/10.1039/C7DT02077E>.
- [6] F. Han, L. Ma, Q. Sun, C. Lei, A. Lu, Rationally designed carbon-coated  $\text{Fe}_3\text{O}_4$  coaxial nanotubes with hierarchical porosity as high-rate anodes for lithium ion batteries, *Nano Res.* 7 (2014) 1706–1717. <https://doi.org/10.1007/s12274-014-0531-y>.
- [7] Y. Zhu, L. Zhang, B. Zhao, H. Chen, X. Liu, R. Zhao, X. Wang, J. Liu, Y. Chen, M. Liu, Improving the Activity for Oxygen Evolution Reaction by Tailoring Oxygen Defects in Double Perovskite Oxides, *Adv. Funct. Mater.* 29 (2019) 1–12. <https://doi.org/10.1002/adfm.201901783>.

- [8] J. Tapia-P, J. Gallego, J.F. Espinal, Calcination Temperature Effect in Catalyst Reactivity for the CO SELOX Reaction Using Perovskite-like  $\text{LaBO}_3$  (B: Mn, Fe, Co, Ni) Oxides, *Catal. Letters*. 151 (2021) 3690–3703. <https://doi.org/10.1007/s10562-021-03601-z>.
